# Supplementary material for: Cotton plant defence against a fungal pathogen is enhanced by expanding BLADE-ON-PETIOLE1 expression beyond lateral-organ boundaries
Source: PubMed Central journal article supplement (PMC6588604; doi:10.1038/s42003-019-0468-5), 2019-06-21
Supplement: 42003_2019_468_MOESM1_ESM.pdf [file 42003_2019_468_MOESM1_ESM.pdf]

1 Supplementary Information

2

Supplementary Figure 1

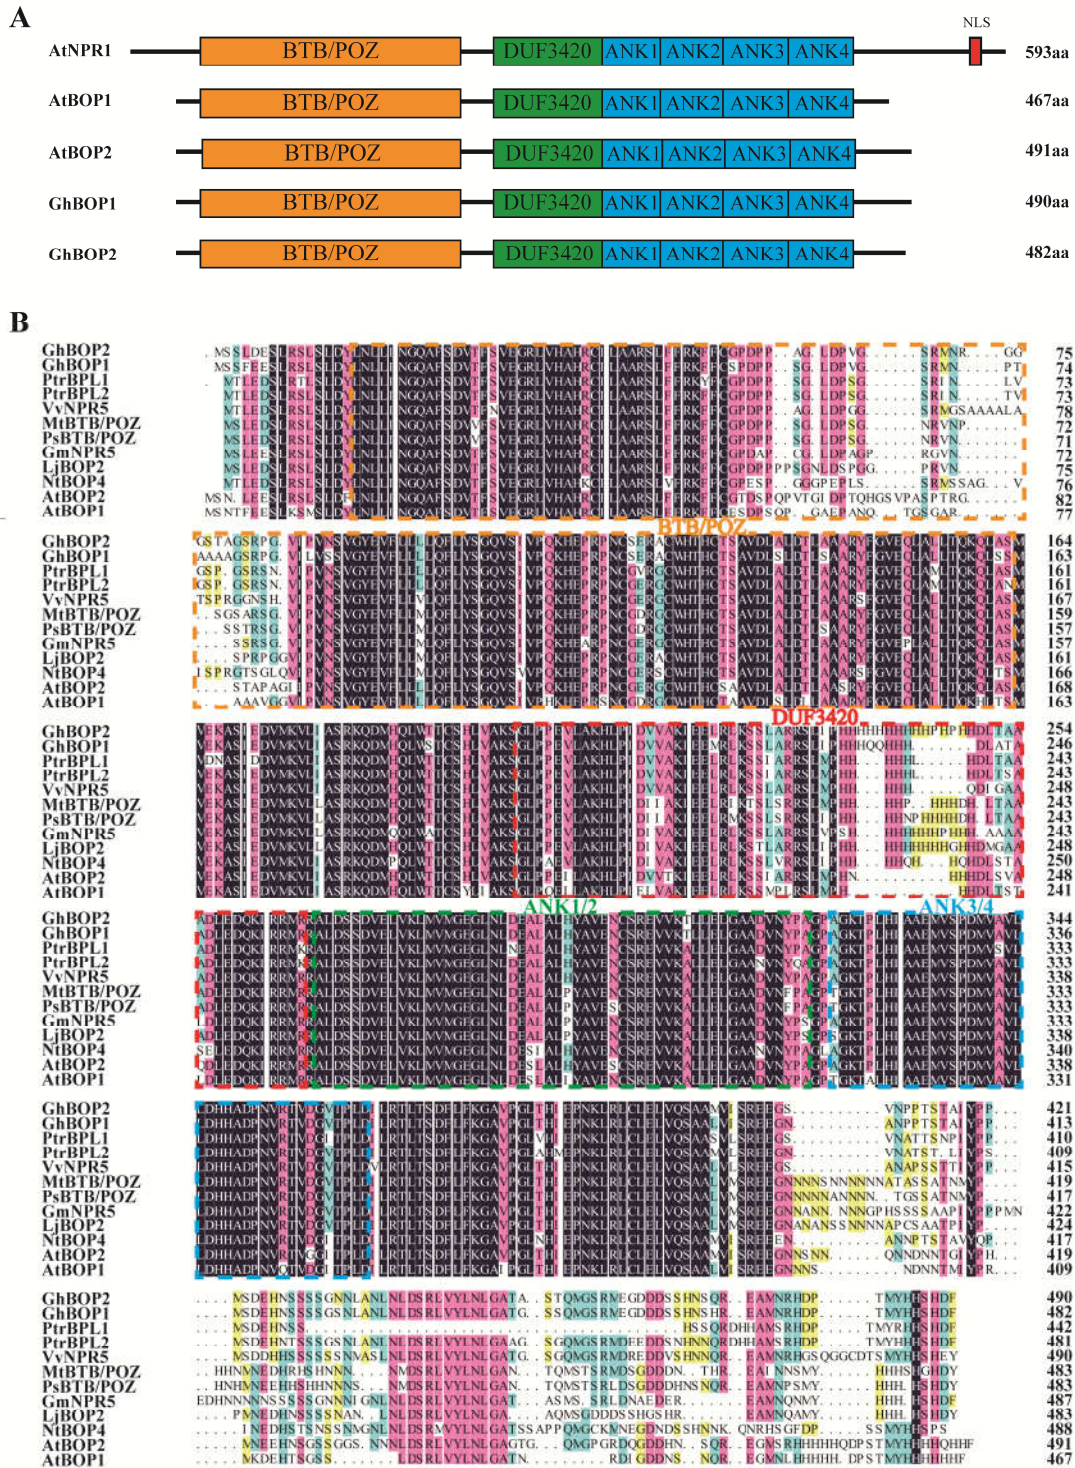

3

4 Supplementary Figure 1. Domain structures of BOPs and NPR1 and amino acid  
5 sequence analysis of BOPs from different plant species.

6 (A) Structural drawing of BOPs from *G. hirsutum* and *A. thalaisana* compared with AtNPR1.

7 BTB/POZ domain (Pfam: 00651), DUF3420 domain (Pfam: 11900), Blue, ANK domain

8 (Pfam: 00023) and NLS (Nuclear localization signal) were indicated in orange, green, blue  
9 and red, respectively.

10 (B) Amino acid alignment of BOP proteins from *G. hirsutum* and other species. The complete  
11 amino acid sequences of BOPs were acquired from NCBI database and performed on  
12 DNAMAN 7.0. The conserved domain of BTB/POZ, DUF3420, ANK1/2 and ANK3/4 was  
13 noted in dotted line frame with orange, red, green and blue, respectively.

14



15

16

### Supplementary Figure 2

|           |                                                                              |      |
|-----------|------------------------------------------------------------------------------|------|
| GhBOP1_At | ATGAGTAGCTTTGAGGAGTCTTAAGATCTCTCCCTGGACTACCTCAATCTCCTCATCAATGGCCAAGCTTTC     | 75   |
| GhBOP1_Dt | ATGAGTAGCTTTGAGGAGTCTTAAGATCTCTCCCTGGACTACCTCAATCTCCTCATCAATGGCCAAGCTTTC     | 75   |
| GhBOP1_At | TCCGATGTAACCTTCAGTGTAGAGGGTCGGTTAGTTCATGCCACAGGTGATTTTAGCAGCCAGGAGCCTTTTC    | 150  |
| GhBOP1_Dt | TCCGATGTAACCTTCAGTGTAGAGGGTCGGTTAGTTCATGCCACAGGTGATTTTAGCAGCCAGGAGCCTTTTC    | 150  |
| GhBOP1_At | TTTAGGAAATCTTTTGCTCACCTGATCCTCCGCTCGGGTTAGACCCGGTTGGTTCAAGGATGAACCCAACAGCA   | 225  |
| GhBOP1_Dt | TTTAGGAAATCTTTTGCTCACCTGATCCTCCGCTCGGGTTAGACCCGGTTGGTTCAAGGATGAACCCAACAGCA   | 225  |
| GhBOP1_At | GCAGCAGCAGGATCAAGGCCGGTGTATTCTAGTGAGCTCAGTGGGATATGAGGTGTTCTTGCTGCTGTTACAG    | 300  |
| GhBOP1_Dt | GCAGCAGCAGGATCAAGGCCGGTGTATTCTAGTGAGCTCAGTGGGATATGAGGTGTTCTTGCTGCTGTTACAG    | 300  |
| GhBOP1_At | TTCTTGATAGTGGCCAAGTCTCTATTGTGCCTAAAAGCAGCAGCCGAGGCCAATTGTAGTGAAGAGCGTGT      | 375  |
| GhBOP1_Dt | TTCTTGATAGTGGCCAAGTCTCTATTGTGCCTAAAAGCAGCAGCCGAGGCCAATTGTAGTGAAGAGCGTGT      | 375  |
| GhBOP1_At | TGGCATAACACATTGCACCTCTGCCGTTGATCTTCTCTTGATACTCTTCTGCCGCTAGATACTTTGGTGTGAA    | 450  |
| GhBOP1_Dt | TGGCATAACACATTGCACCTCTGCCGTTGATCTTCTCTTGATACTCTTCTGCCGCTAGATACTTTGGTGTGAA    | 450  |
| GhBOP1_At | CAGCTTGCATTGCTTACTCAGAAACAATTATCCAGCATGGTCGAGAAGGCCCAATTGAAGATGTTATGAAAGTA   | 525  |
| GhBOP1_Dt | CAGCTTGCATTGCTTACTCAGAAACAATTATCCAGCATGGTCGAGAAGGCCCAATTGAAGATGTTATGAAAGTA   | 525  |
| GhBOP1_At | CTAATAGCTTCAAGAAAGCAAGACATGCACCAACTTTGGTCTACTTGTCCACCTAGTGGCCAATCAGGCCTA     | 600  |
| GhBOP1_Dt | CTAATAGCTTCAAGAAAGCAAGACATGCACCAACTTTGGTCTACTTGTCCACCTAGTGGCCAATCAGGCCTA     | 600  |
| GhBOP1_At | CCACCAGAAGTTCGCGCAAGCATCTTCCCATCGATGTGGTTGCCAAAATGAGGAGATGCGTCTCAAGTCATCC    | 675  |
| GhBOP1_Dt | CCACCAGAAGTTCGCGCAAGCATCTTCCCATCGATGTGGTTGCCAAAATGAGGAGATGCGTCTCAAGTCATCC    | 675  |
| GhBOP1_At | CTTGCTCGAGCTCCCTCATCCCTCATCATCATCAGCAGCATCACCATGATCTTGCTACGGCCGCTCATCTTGAG   | 750  |
| GhBOP1_Dt | CTTGCTCGAGCTCCCTCATCCCTCATCATCATCAGCAGCATCACCATGATCTTGCTACGGCCGCTCATCTTGAG   | 750  |
| GhBOP1_At | GACCAAAAGATTTCGTAGGATGAGAAGGGCATTAGACTCATCGGATGTTGAACCTGTTAAGCTCATGGTCATGGGA | 825  |
| GhBOP1_Dt | GACCAAAAGATTTCGTAGGATGAGAAGGGCATTAGACTCATCGGATGTTGAACCTGTTAAGCTCATGGTCATGGGA | 825  |
| GhBOP1_At | GAGGGTCTTAATCTTGATGAAGCATTGGCTTTACACTATGCTGTGAGAACTGCAGCCGGGAAGTGGTTAAGACG   | 900  |
| GhBOP1_Dt | GAGGGTCTTAATCTTGATGAAGCATTGGCTTTACACTATGCTGTGAGAACTGCAGCCGGGAAGTGGTTAAGACG   | 900  |
| GhBOP1_At | TTGTTAGAGCTTTGGGCAGCCGATGTTAACTACCCGGCCGGCCCTGCAGGTAAMACCCCACTTCATATGCGGGC   | 975  |
| GhBOP1_Dt | TTGTTAGAGCTTTGGGCAGCCGATGTTAACTACCCGGCCGGCCCTGCAGGTAAMACCCCACTTCATATGCGGGC   | 975  |
| GhBOP1_At | GAAATGGTATCACCAGATATGGTTGCAGTGTCTTAGATCACCACGGGACCCTAATGTAAGAACCGTTGATGGG    | 1050 |
| GhBOP1_Dt | GAAATGGTATCACCAGATATGGTTGCAGTGTCTTAGATCACCACGGGACCCTAATGTAAGAACCGTTGATGGG    | 1050 |
| GhBOP1_At | GTGACTCCTTTGGACATCTTCGAACACTAACCTCTGATTTCTTGTTCAAAGGTGCGGTGCCGGGGCTTACTCAC   | 1125 |
| GhBOP1_Dt | GTGACTCCTTTGGACATCTTCGAACACTAACCTCTGATTTCTTGTTCAAAGGTGCGGTGCCGGGGCTTACTCAC   | 1125 |
| GhBOP1_At | ATTGAACCGAATAAGCTTAGGCTATGTCTTGAGCTTGTTCAATCCGCAGCTTTGGTTATCTCGCGTGAAGAAGGA  | 1200 |
| GhBOP1_Dt | ATTGAACCGAATAAGCTTAGGCTATGTCTTGAGCTTGTTCAATCCGCAGCTTTGGTTATCTCGCGTGAAGAAGGA  | 1200 |
| GhBOP1_At | AACGCAAAACCACCAACTTCAACTGCCATTTACCCACCAATGAGTGTGAACATAACAGCAGTAGCAGTGGAAAGC  | 1275 |
| GhBOP1_Dt | AACGCAAAACCACCAACTTCAACTGCCATTTACCCACCAATGAGTGTGAACATAACAGCAGTAGCAGTGGAAAGC  | 1275 |
| GhBOP1_At | AATCTTGCTAACCTTAATCTGGATTCAAGGTTGGTTTATCTCAATCTAGGTGCTACAGGTTCAAATCAAATGGGT  | 1350 |
| GhBOP1_Dt | AATCTTGCTAACCTTAATCTGGATTCAAGGTTGGTTTATCTCAATCTAGGTGCTACAGGTTCAAATCAAATGGGT  | 1350 |
| GhBOP1_At | TCGAGAATGGAGGGTATGATGATAGCAGCCACAACAGCCACAGAGAAGCCATGAACCGACATGACCCAAACATG   | 1425 |
| GhBOP1_Dt | TCGAGAATGGAGGGTATGATGATAGCAGCCACAACAGCCACAGAGAAGCCATGAACCGACATGACCCAAACATG   | 1425 |
| GhBOP1_At | TACCATCACTCTCATGATTTCTAG                                                     | 1449 |
| GhBOP1_Dt | TACCATCACTCTCATGATTTCTAG                                                     | 1449 |

17 **Supplementary Figure 2. Alignment of CDS sequences between *GhBOP1* at At and Dt**  
 18 **subgenome.** The red asterisks indicate the mismatched nucleotides.

19

20

21

### Supplementary Figure 3

|           |                                                                                                                      |     |
|-----------|----------------------------------------------------------------------------------------------------------------------|-----|
| GhBOP1_At | MSSFEESLRSLSDYLNLLINGQAFSDVTFVSEGRVLAHRCILAARSLFFRKFCCSPDPPSGLDPVGSRMNPTA                                            | 75  |
| GhBOP1_Dt | MSSFEESLRSLSDYLNLLINGQAFSDVTFVSEGRVLAHRCILAARSLFFRKFCCSPDPPSGLDPVGSRMNPTA                                            | 75  |
| GhBOP1_At | AAAGSRPGVILVSSVGYEVFLLLLQFLYSGQVSIVPQKHEPRPNCSEACWHTHCTSAVDLSLDTLSAARYFGVE                                           | 150 |
| GhBOP1_Dt | AAAGSRPGVILVSSVGYEVFLLLLQFLYSGQVSIVPQKHEPRPNCSEACWHTHCTSAVDLSLDTLSAARYFGVE                                           | 150 |
| GhBOP1_At | QLALLTQKQLSSMVEKASIEDVMKVLIASRKQDMHQLWSTCSHLVAKSGLPPEVLAKHLPIDVVAKTEEMRLKSS                                          | 225 |
| GhBOP1_Dt | QLALLTQKQLSSMVEKASIEDVMKVLIASRKQDMHQLWSTCSHLVAKSGLPPEVLAKHLPIDVVAKTEEMRLKSS                                          | 225 |
| GhBOP1_At | LARRSLIPHHHQHHHDLATAADLE <sup>*</sup> EDQKIRRMRRALDSSDVELVKLMVMGEGLNDEALALHYAVENC <sup>*</sup> SREVVK <sup>*</sup> T | 300 |
| GhBOP1_Dt | LARRSLIPHHHQHHHDLATAADLE <sup>*</sup> EDQKIRRMRRALDSSDVELVKLMVMGEGLNDEALALHYAVENC <sup>*</sup> SREVVK <sup>*</sup> T | 300 |
| GhBOP1_At | LLELGAADVNYAPAGPAGKTPLHTAAEMVSPDMVAVLLDHHADPNVRTVDGVTPLDLRLTSDFLFKGAVPGLTH                                           | 375 |
| GhBOP1_Dt | LLELGAADVNYAPAGPAGKTPLHTAAEMVSPDMVAVLLDHHADPNVRTVDGVTPLDLRLTSDFLFKGAVPGLTH                                           | 375 |
| GhBOP1_At | TEPNKLRCLCELVQSAALVISREEGNANPPTSTAI <sup>*</sup> YPPMSDEHNSSSSGSNLANLNLDSRLVYLNLGATGSS <sup>*</sup> QMG              | 450 |
| GhBOP1_Dt | TEPNKLRCLCELVQSAALVISREEGNANPPTSTAV <sup>*</sup> YPPMSDEHNSSSSGSNLANLNLDSRLVYLNLGATGSS <sup>*</sup> QMG              | 450 |
| GhBOP1_At | SRMEGDDSSSHNSHREAMNRHDP <sup>*</sup> TMYHHSHDF                                                                       | 482 |
| GhBOP1_Dt | SRMEGDDSSSHNSHREAMNRHDP <sup>*</sup> TMYHHSHDF                                                                       | 482 |

22 **Supplementary Figure 3. Alignment of amino acid sequences between *GhBOP1* at At**  
 23 **and Dt subgenome. The red asterisks indicate the mismatched amino acids.**

24

25

26

### Supplementary Figure 4

A

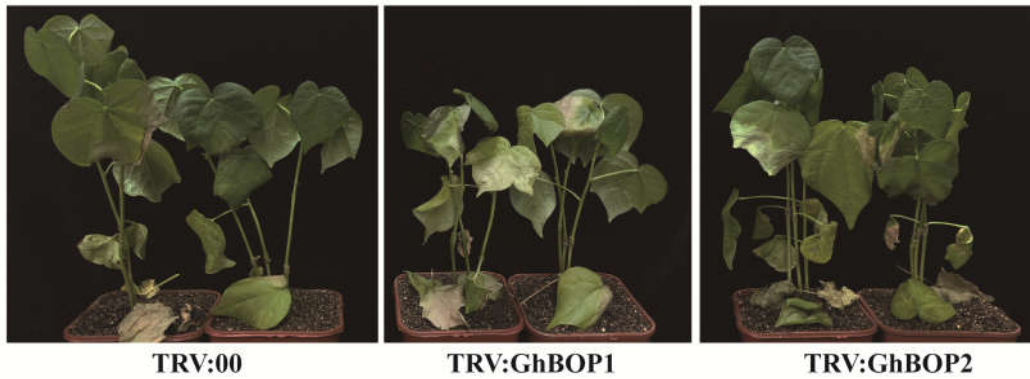

B

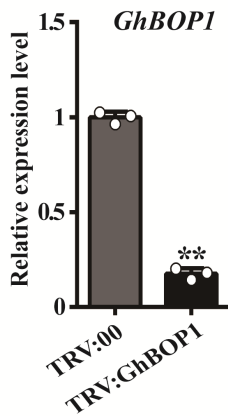

C

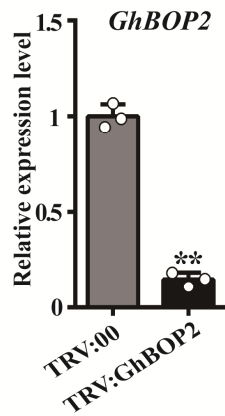

D

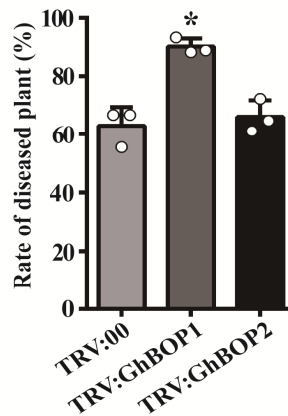

E

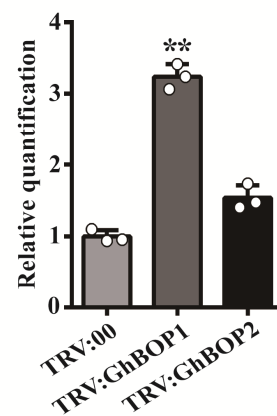

27

28 **Supplementary Figure 4. *GhBOP1*-silenced plants decreased the resistance to *V. dahliae*.**

29 (A) Disease symptoms of TRV:00, TRV:GhBOP1 and TRV:GhBOP2 plants inoculated with *V.*

30 *dahliae*.

31 (B) Relative expression levels of *GhBOP1* in roots of TRV:00 and TRV:GhBOP1 plants. Error

32 bars represent the SD of three biological replicates. Asterisks indicate statistically significant

33 differences, as determined by Student's *t*-test (\*\**P* < 0.01).

34 (C) The relative expression levels of *GhBOP2* in roots of TRV:00 and TRV:GhBOP2 plants.

35 Error bars represent the SD of three biological replicates. Asterisks indicate statistically

36 significant differences, as determined by Student's *t*-test (\*\**P* < 0.01).

37 (D) Diseased rate analysis of TRV:00, TRV:GBOP1 and TRV:GhBOP2 plants. Error bars

38 represent the SD of three biological replicates. Asterisks indicate statistically significant

39 differences compared to TRV:00 as determined by Student's *t*-test (\*\**P* < 0.01).

40 (E) Relative quantification of the fungal biomass in the infected stems of TRV:00,

41 TRV:GBOP1 and TRV:GhBOP2 plants. Error bars represent the SD of three biological

42 replicates. Asterisks indicate statistically significant differences compared to TRV:00, as

43 determined by Student's *t*-test (\*\**P* < 0.01).

44

45

46

### Supplementary Figure 5

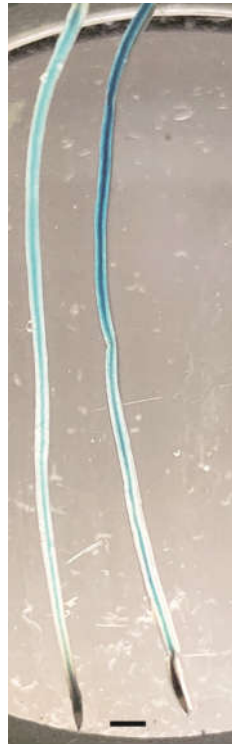

Mock *V.d*

47 **Supplementary Figure 5. GUS staining analysis the expression level of GhBOP1.** The  
48 expression level of GhBOP1 in the roots of GhBOP1pro:GUS transgenic plants were analyzed  
49 by GUS staining at 3 d after inoculated with *V. dahliae*. The scale bars indicate 1 mm.  
50



51

52

### Supplementary Figure 6

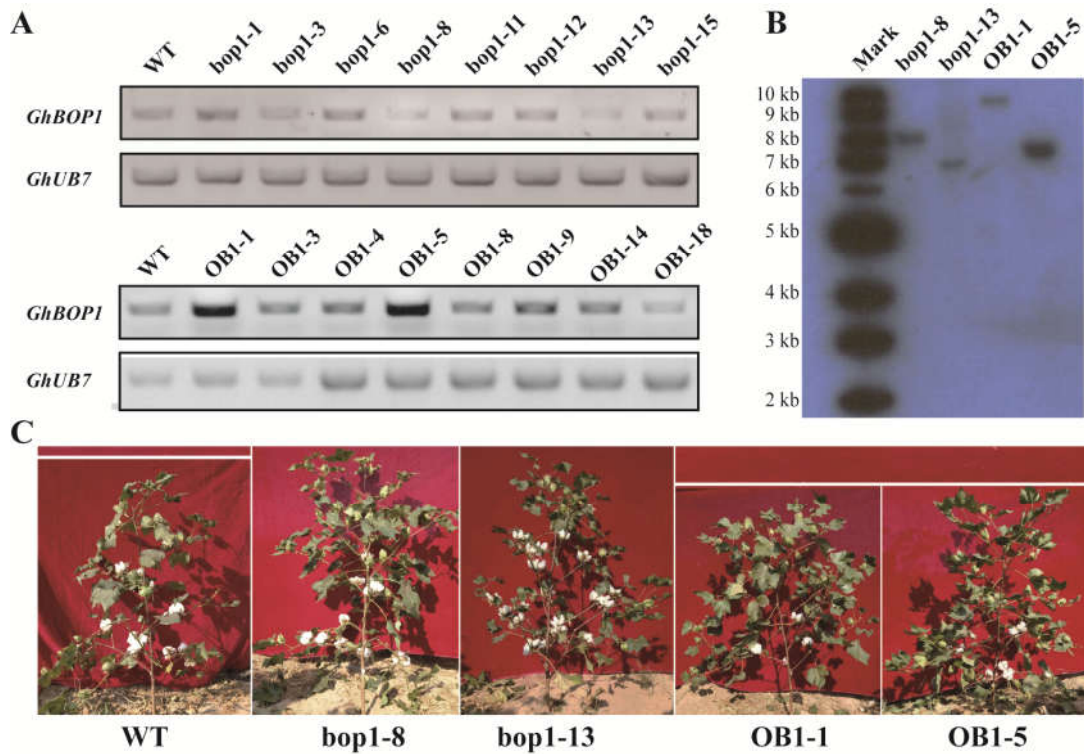

53

54 **Supplementary Figure 6. Molecular identification and adult phenotypes of GhBOP1**  
55 **transgenic plants.**

56 (A) PCR was performed to detect the *GhBOP1* and the *GhUB7* expression levels in roots. The  
57 *GhUB7* gene was used as internal control.

58 (B) Southern blotting analysis in the four transgenic lines.

59 (C) Adult phenotypes of WT and transgenic cotton plants.

60

61

62

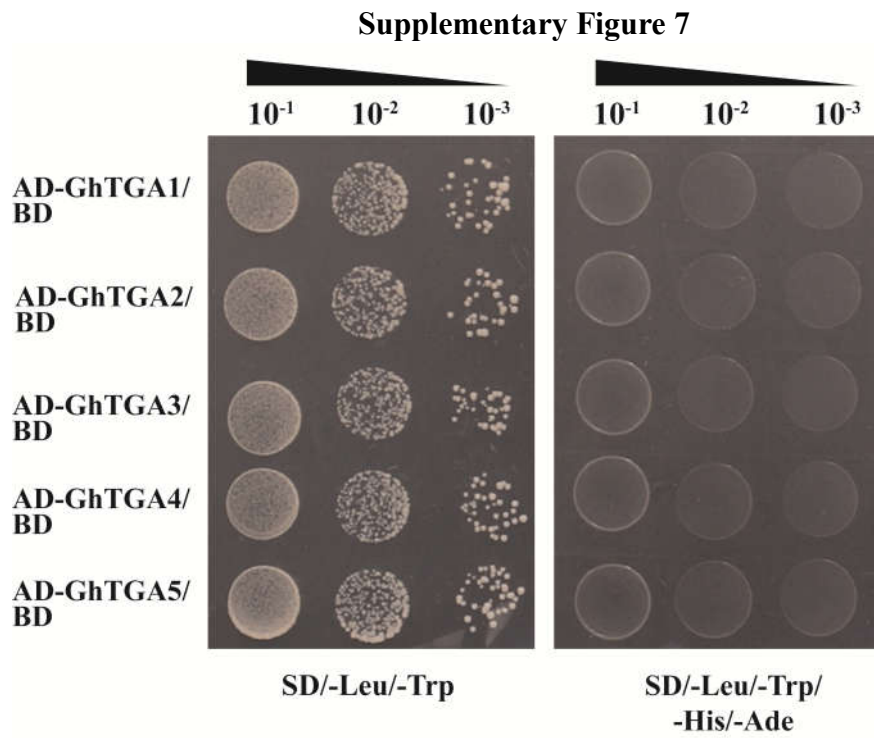

63

**Supplementary Figure 7. Self-activation assay of AD-GhTGAs in yeast.**

64

65



66

67

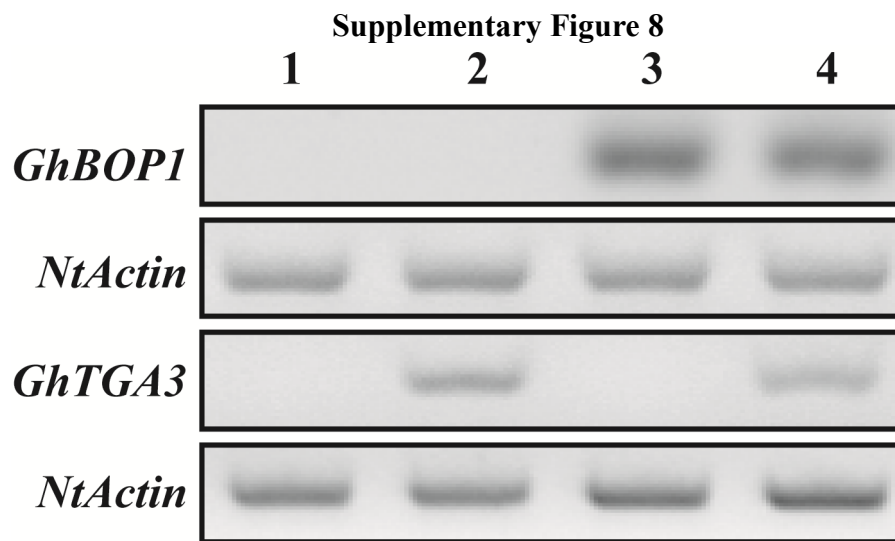

68

69 **Supplementary Figure 8. RT-PCR detected the *GhBOP1* and *GhTGA3* expression levels**

70 **in tobacco leaf at 48h after infiltrated by the vectors shown in Figure 6A.**

71

72  
73

### Supplementary Figure 9

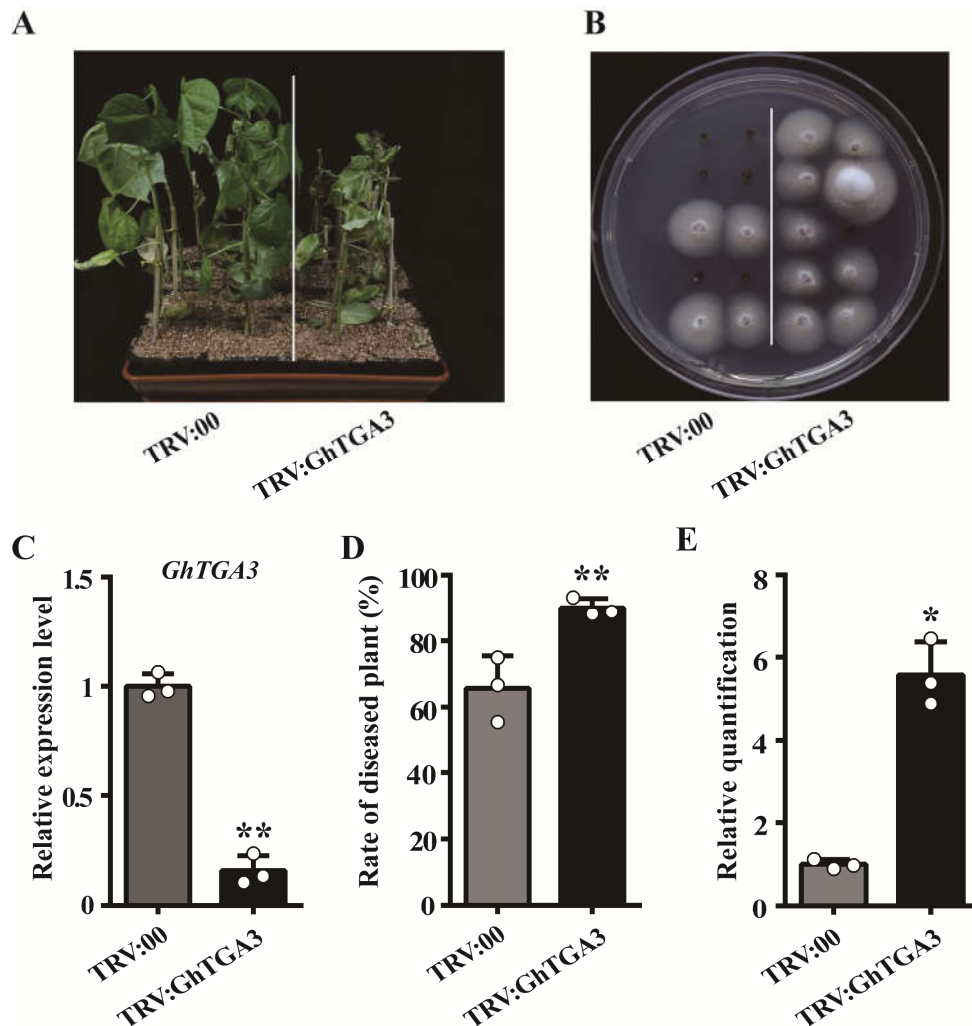

74 **Supplementary Figure 9. GhTGA3 positively regulating plant defence against *V. dahliae***  
75 (A) Disease symptoms of TRV:00 and TRV:GhTGA3 inoculated with *V. dahliae*. Photographs  
76 were taken at 18 d after pathogen inoculation.  
77 (B) Fungal recovery assay to detect the morbidity of TRV:00 and TRV:GhTGA3 plants. The  
78 stem section of the inoculated plants was placed on PDA medium and taken photographs at 4  
79 d after culture.  
80 (C) Relative expression levels of *GhTGA3* in roots of TRV:00 and TRV:GhTGA3 plants.  
81 Error bars represent the SD of three biological replicates. Asterisks indicate statistically  
82 significant differences, as determined by Student's *t*-test (\*\* $P < 0.01$ ).  
83 (D) Diseased rate analysis of TRV:00 and TRV:GhTGA3 plants. Error bars represent the SD  
84 of three biological replicates. Asterisks indicate statistically significant differences compared  
85 to TRV:00 as determined by Student's *t*-test (\*\* $P < 0.01$ ).  
86 (E) Relative quantification of the fungal biomass in the infected stems of TRV:00 and  
87 TRV:GhTGA3 plants. Error bars represent the SD of three biological replicates. Asterisks  
88 indicate statistically significant differences, as determined by Student's *t*-test ( $P < 0.05$ ).

89

90

Supplementary Figure 10

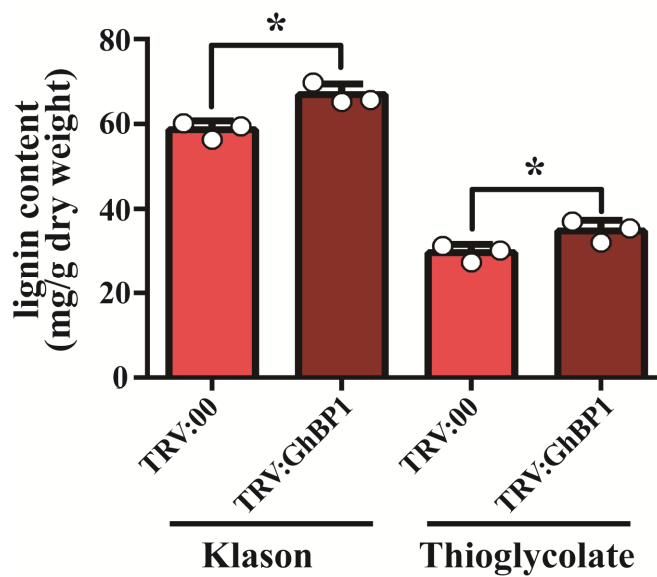

91 **Supplementary Figure 10. GhBP1 negatively regulating lignin deposition.** Analysis of  
92 lignin content in *GhBP1*-silenced plant stems through Klason and thioglycolate methods.  
93 Error bars represent the SD (n=18) of three biological replicates. Asterisks indicate  
94 statistically significant differences, as determined by Student's *t*-test (\*\* $P < 0.01$ ).  
95

96

97

### Supplementary Figure 11

```

GhBOP1                               AGGGCCGCTATTTA 14
GhBOP2 CACTCCCTCTCCCTCTCCCTCTCCCTCTTCTAAAGTTTTCTCTTTTCTCTGTCTATCAAAA  

                                         AAAAAATATAATATATC 75
GhBOP1 AATACAGAAACAAACCACAGCACTCATCGGGATGGAAAGAATCTCTC...TACAAAAACCA  

                                         GTAACAGTAACCTC 86
GhBOP2 CCTATCGACAAAAACCCACACCACTTTCATCGAGAGGAAAGAATCTCTCAA  

                                         TACAAAAACCAATTACAGTAACCTC 105
GhBOP1 CATTCTTCTTCCCTTGGAAATGA.....AAACCATCGTCTCCGTCTCCATCTTCTCTTTT  

                                         GTCTATCTCCT 155
GhBOP2 CTCCGTTTCTTTCAAAATGAAACCATCATCTAAATCCCTACTTATTCTCTAACTACTACTT  

                                         CTCTCTCTTCT 255
GhBOP1 TCATCTTTTCTTAAT...CGAGACCCCTGGTTTTCAGAAGCAACAGAATTTCTTTTTCTT  

                                         TACTCGTGAA 224
GhBOP2 TCTTCGTGTACTTGATTCAACAACATACTTGTATCCAAAAAGAGAAGATTTTCTTTTTGTA  

                                         TTCCTCTGGGA 300
GhBOP1 AGACAACCCATAAATGAGTAGC..... 246
GhBOP2 AAACAACCTAAATGAGTAGC..... 322

```

98 **Supplementary Figure 11. Alignment of 5'UTR sequences between *GhBOP1* and**  
 99 ***GhBOP2*.** The opposite blue and green arrows indicate the specific primer sequences used for  
 100 VIGS analysis of *GhBOP1* and *GhBOP2*, respectively. The red hollow frame indicates  
 101 initiation codon.  
 102



103

104

105

### Supplementary Figure 12

Figure 4B

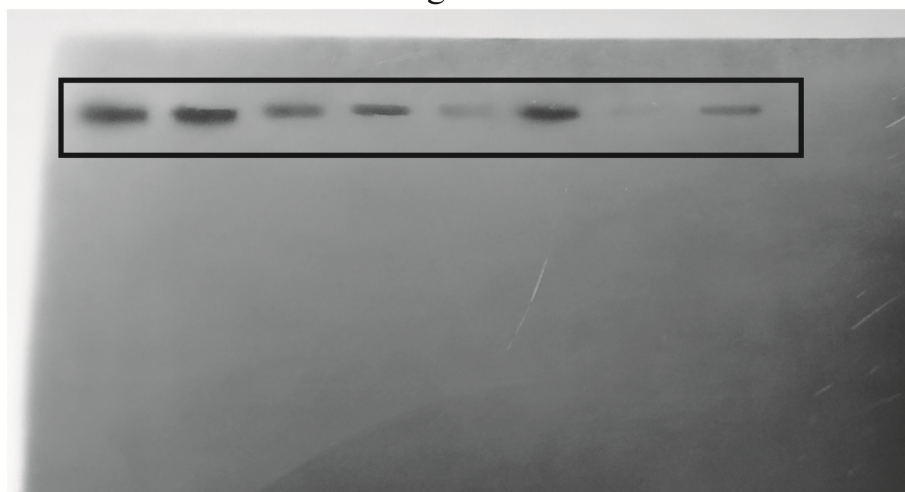

Figure 5A

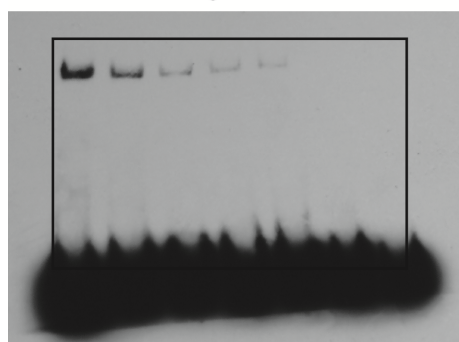

Figure 5B

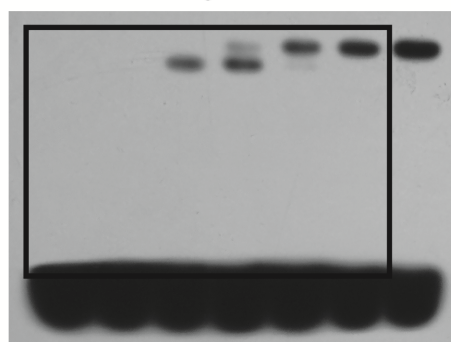

106

107 **Supplementary Figure 12. Uncropped blot and gel images.** The black rectangles shown the  
108 final cropped part of the image from main figures (figure 4 to 5).

109

110

111

112

113

114

**Supplementary Table 1. Cis-element analysis of GhPR1 promoter**

|                 | motif name           | motif sequence | motif site upstream of<br>ATG | direction |
|-----------------|----------------------|----------------|-------------------------------|-----------|
| PlantCARE_13222 | ERE                  | ATTTTAAA       | 1228                          | +         |
| PlantCARE_13222 | MYB-like<br>sequence | TAACCA         | 383                           | -         |
| PlantCARE_13222 | CGTCA-motif          | CGTCA          | 846                           | +         |
| PlantCARE_13222 | AAGAA-motif          | GGTAAAGAAA     | 1447                          | -         |
| PlantCARE_13222 | AAGAA-motif          | GAAAGAA        | 347                           | +         |
| PlantCARE_13222 | P-box                | CCTTTTG        | 1049                          | -         |
| PlantCARE_13222 | Unnamed__1           | CGTGG          | 1068                          | +         |
| PlantCARE_13222 | GARE-motif           | TCTGTTG        | 1004                          | -         |
| PlantCARE_13222 | I-box                | TGATAATGT      | 1282                          | +         |
| PlantCARE_13222 | Box 4                | ATTAAT         | 1382                          | +         |
| PlantCARE_13222 | Box 4                | ATTAAT         | 1158                          | +         |
| PlantCARE_13222 | Box 4                | ATTAAT         | 316                           | -         |
| PlantCARE_13222 | <b>TGACG-motif</b>   | <b>TGACG</b>   | <b>846</b>                    | <b>-</b>  |
| PlantCARE_13222 | AuxRR-core           | GGTCCAT        | 403                           | +         |
| PlantCARE_13222 | TATC-box             | TATCCCA        | 622                           | +         |
| PlantCARE_13222 | W box                | TTGACC         | 786                           | +         |
| PlantCARE_13222 | F-box                | CTATTCTCATT    | 1458                          | +         |
| PlantCARE_13222 | Unnamed__6           | taTAAATATct    | 87                            | +         |
| PlantCARE_13222 | chs-CMA1a            | TTACTTAA       | 1038                          | +         |
| PlantCARE_13222 | Sp1                  | GGGCGG         | 1175                          | +         |
| PlantCARE_13222 | WUN-motif            | AAATTACT       | 728                           | -         |
| PlantCARE_13222 | WUN-motif            | AAATTTCTT      | 589                           | -         |
| PlantCARE_13222 | AT~TATA-box          | TATATA         | 1377                          | +         |
| PlantCARE_13222 | AT~TATA-box          | TATATA         | 1375                          | +         |
| PlantCARE_13222 | AT~TATA-box          | TATATA         | 1019                          | +         |
| PlantCARE_13222 | AT~TATA-box          | TATATA         | 1017                          | +         |
| PlantCARE_13222 | AT~TATA-box          | TATATAAA       | 771                           | -         |
| PlantCARE_13222 | AT~TATA-box          | TATATA         | 769                           | -         |
| PlantCARE_13222 | AT~TATA-box          | TATATA         | 767                           | -         |
| PlantCARE_13222 | AT~TATA-box          | TATATA         | 765                           | -         |
| PlantCARE_13222 | AT~TATA-box          | TATATA         | 376                           | -         |
| PlantCARE_13222 | AT~TATA-box          | TATATAAA       | 191                           | -         |
| PlantCARE_13222 | AT~TATA-box          | TATATA         | 189                           | -         |
| PlantCARE_13222 | CAAT-box             | CAAT           | 1489                          | +         |
| PlantCARE_13222 | CAAT-box             | CAAT           | 1484                          | +         |
| PlantCARE_13222 | CAAT-box             | CCAAT          | 1406                          | -         |
| PlantCARE_13222 | CAAT-box             | CAAAT          | 1394                          | +         |
| PlantCARE_13222 | CAAT-box             | CAAAT          | 1331                          | -         |

|                 |            |            |      |   |
|-----------------|------------|------------|------|---|
| PlantCARE_13222 | CAAT-box   | CAAT       | 1287 | + |
| PlantCARE_13222 | CAAT-box   | CAAAT      | 1285 | - |
| PlantCARE_13222 | CAAT-box   | CAAT       | 1057 | - |
| PlantCARE_13222 | CAAT-box   | CAAT       | 1009 | - |
| PlantCARE_13222 | CAAT-box   | CAAT       | 982  | - |
| PlantCARE_13222 | CAAT-box   | CAAAT      | 880  | + |
| PlantCARE_13222 | CAAT-box   | CAAAT      | 816  | + |
| PlantCARE_13222 | CAAT-box   | CAAT       | 787  | - |
| PlantCARE_13222 | CAAT-box   | CAAAT      | 753  | + |
| PlantCARE_13222 | CAAT-box   | CAAAT      | 724  | - |
| PlantCARE_13222 | CAAT-box   | CAAAT      | 699  | - |
| PlantCARE_13222 | CAAT-box   | CAAT       | 692  | + |
| PlantCARE_13222 | CAAT-box   | CAAT       | 558  | + |
| PlantCARE_13222 | CAAT-box   | CAAT       | 540  | - |
| PlantCARE_13222 | CAAT-box   | CAAAT      | 427  | - |
| PlantCARE_13222 | CAAT-box   | CAAAT      | 422  | - |
| PlantCARE_13222 | CAAT-box   | CAAAT      | 393  | - |
| PlantCARE_13222 | CAAT-box   | CAAAT      | 388  | + |
| PlantCARE_13222 | CAAT-box   | CCAAT      | 385  | - |
| PlantCARE_13222 | CAAT-box   | CAAT       | 289  | + |
| PlantCARE_13222 | CAAT-box   | CCAAT      | 235  | + |
| PlantCARE_13222 | CAAT-box   | CAAT       | 234  | + |
| PlantCARE_13222 | CAAT-box   | CAAAT      | 184  | - |
| PlantCARE_13222 | CAAT-box   | CAAT       | 154  | + |
| PlantCARE_13222 | CAAT-box   | CAAT       | 32   | - |
| PlantCARE_13222 | CAAT-box   | CAAT       | 28   | + |
| PlantCARE_13222 | G-Box      | CACGTT     | 1070 | - |
| PlantCARE_13222 | GATA-motif | GATAGGA    | 1064 | + |
| PlantCARE_13222 | O2-site    | GATGATGTGG | 913  | + |
| PlantCARE_13222 | GT1-motif  | GGTAAAT    | 382  | + |
| PlantCARE_13222 | TATA-box   | TATA       | 1496 | + |
| PlantCARE_13222 | TATA-box   | ATTATA     | 1468 | + |
| PlantCARE_13222 | TATA-box   | TATAA      | 1467 | - |
| PlantCARE_13222 | TATA-box   | TATA       | 1466 | + |
| PlantCARE_13222 | TATA-box   | ATATAT     | 1378 | + |
| PlantCARE_13222 | TATA-box   | TATATA     | 1377 | + |
| PlantCARE_13222 | TATA-box   | ATATAT     | 1376 | + |
| PlantCARE_13222 | TATA-box   | TATATA     | 1375 | + |
| PlantCARE_13222 | TATA-box   | ATATAT     | 1374 | + |
| PlantCARE_13222 | TATA-box   | TATA       | 1373 | + |
| PlantCARE_13222 | TATA-box   | TATAAATA   | 1364 | - |
| PlantCARE_13222 | TATA-box   | TATAAAT    | 1363 | - |
| PlantCARE_13222 | TATA-box   | TATAAA     | 1362 | - |
| PlantCARE_13222 | TATA-box   | TATAA      | 1361 | - |

|                 |          |            |      |   |
|-----------------|----------|------------|------|---|
| PlantCARE_13222 | TATA-box | TATA       | 1360 | + |
| PlantCARE_13222 | TATA-box | ccTATAAAaa | 1201 | + |
| PlantCARE_13222 | TATA-box | TATA       | 1199 | + |
| PlantCARE_13222 | TATA-box | ATATAA     | 1130 | + |
| PlantCARE_13222 | TATA-box | TATA       | 1129 | + |
| PlantCARE_13222 | TATA-box | TATAAA     | 1088 | - |
| PlantCARE_13222 | TATA-box | TATAA      | 1087 | - |
| PlantCARE_13222 | TATA-box | TATA       | 1086 | + |
| PlantCARE_13222 | TATA-box | ATTATA     | 1021 | + |
| PlantCARE_13222 | TATA-box | TATATAA    | 1020 | - |
| PlantCARE_13222 | TATA-box | TATATA     | 1019 | + |
| PlantCARE_13222 | TATA-box | ATATAT     | 1018 | + |
| PlantCARE_13222 | TATA-box | TATATA     | 1017 | + |
| PlantCARE_13222 | TATA-box | ATATAA     | 1016 | + |
| PlantCARE_13222 | TATA-box | TATA       | 1015 | + |
| PlantCARE_13222 | TATA-box | ATTATA     | 877  | + |
| PlantCARE_13222 | TATA-box | TATAA      | 876  | - |
| PlantCARE_13222 | TATA-box | TATA       | 875  | - |
| PlantCARE_13222 | TATA-box | TATAA      | 865  | - |
| PlantCARE_13222 | TATA-box | TATA       | 864  | - |
| PlantCARE_13222 | TATA-box | taTATAAAtc | 773  | - |
| PlantCARE_13222 | TATA-box | TATAAAT    | 772  | - |
| PlantCARE_13222 | TATA-box | TATAAA     | 771  | - |
| PlantCARE_13222 | TATA-box | TATATAA    | 770  | - |
| PlantCARE_13222 | TATA-box | TATATA     | 769  | - |
| PlantCARE_13222 | TATA-box | ATATAT     | 768  | - |
| PlantCARE_13222 | TATA-box | TATATA     | 767  | - |
| PlantCARE_13222 | TATA-box | ATATAT     | 766  | - |
| PlantCARE_13222 | TATA-box | TATATA     | 765  | - |
| PlantCARE_13222 | TATA-box | ATATAA     | 764  | + |
| PlantCARE_13222 | TATA-box | TATA       | 763  | - |
| PlantCARE_13222 | TATA-box | TATAAATA   | 555  | - |
| PlantCARE_13222 | TATA-box | TATAAAT    | 554  | - |
| PlantCARE_13222 | TATA-box | TATAAA     | 553  | - |
| PlantCARE_13222 | TATA-box | TATAA      | 552  | - |
| PlantCARE_13222 | TATA-box | TATA       | 551  | - |
| PlantCARE_13222 | TATA-box | ATATAT     | 377  | - |
| PlantCARE_13222 | TATA-box | TATATA     | 376  | - |
| PlantCARE_13222 | TATA-box | ATATAT     | 375  | - |
| PlantCARE_13222 | TATA-box | TATA       | 374  | - |
| PlantCARE_13222 | TATA-box | ATTATA     | 302  | + |
| PlantCARE_13222 | TATA-box | TATAA      | 301  | - |
| PlantCARE_13222 | TATA-box | TATA       | 300  | - |
| PlantCARE_13222 | TATA-box | TATA       | 249  | - |



|                 |                     |          |      |   |
|-----------------|---------------------|----------|------|---|
| PlantCARE_13222 | TATA-box            | TATAAAA  | 192  | - |
| PlantCARE_13222 | TATA-box            | TATAAA   | 191  | - |
| PlantCARE_13222 | TATA-box            | TATATAA  | 190  | - |
| PlantCARE_13222 | TATA-box            | TATATA   | 189  | - |
| PlantCARE_13222 | TATA-box            | ATATAT   | 188  | - |
| PlantCARE_13222 | TATA-box            | TATA     | 187  | - |
| PlantCARE_13222 | TATA-box            | TATA     | 87   | - |
| PlantCARE_13222 | TATA-box            | TATAAGAA | 23   | - |
| PlantCARE_13222 | TATA-box            | TATAA    | 20   | - |
| PlantCARE_13222 | TATA-box            | TATA     | 19   | - |
| PlantCARE_13222 | ARE                 | AAACCA   | 224  | + |
| PlantCARE_13222 | MYB                 | CAACAG   | 1004 | + |
| PlantCARE_13222 | MYB                 | CAACAG   | 688  | + |
| PlantCARE_13222 | MYB                 | TAACCA   | 383  | - |
| PlantCARE_13222 | chs-CMA2a           | TCACTTGA | 1306 | - |
| PlantCARE_13222 | TCT-motif           | TCTTAC   | 1098 | - |
| PlantCARE_13222 | Myb-binding<br>site | CAACAG   | 1004 | + |
| PlantCARE_13222 | Myb-binding<br>site | CAACAG   | 688  | + |
| PlantCARE_13222 | ABRE                | ACGTG    | 1069 | + |
| PlantCARE_13222 | ABRE                | TACGGTC  | 406  | + |

115 TGACG-element is highlight in red

116
